# Supplementary material for: Ultrahigh-Throughput Multiplexing and Sequencing of >500-Base-Pair Amplicon Regions on the Illumina HiSeq 2500 Platform
Source: PubMed Central journal article supplement (PMC6381223; doi:10.1128/msystems.00029-19), 2019-02-19
Supplement: mSystems.00029-19-sf004.pdf [file mSystems.00029-19-sf004.pdf]

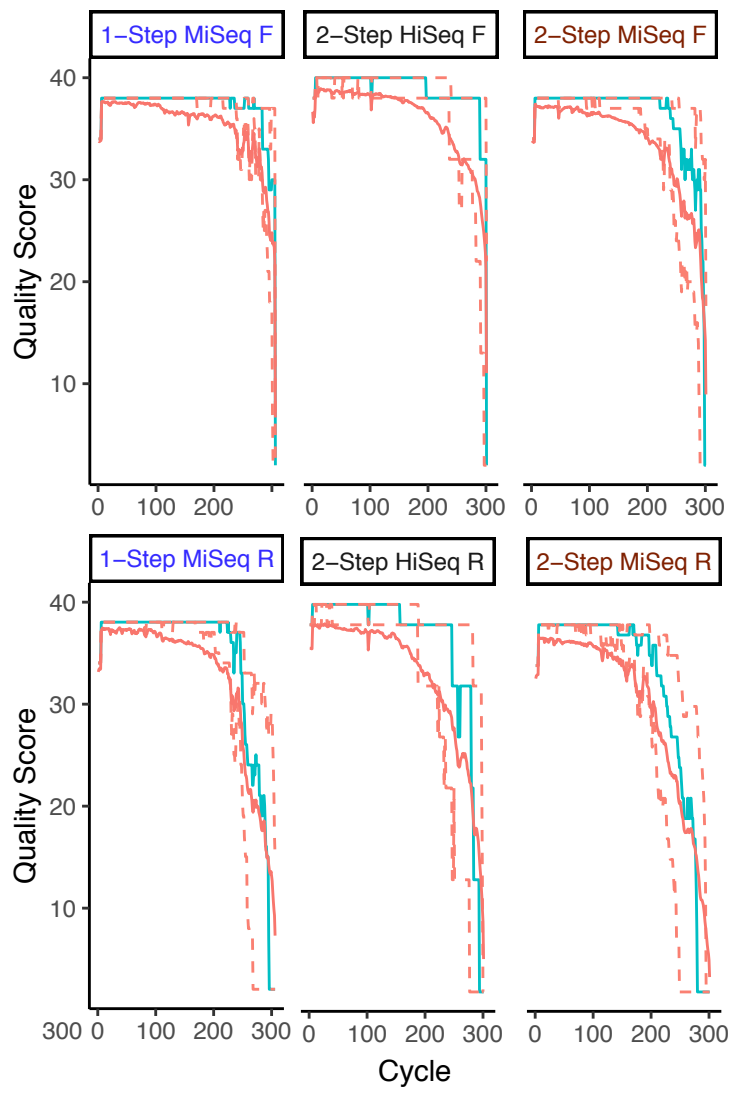

FIG S4
